# Supplementary material for: Convenient divergent synthesis of linear-dendron block polyphosphoesters via acyclic diene metathesis polymerization
Source: Royal Society of Chemistry journal article supplement (doi:10.1039/c4py00327f), 2014-01-01
Supplement: c4py00327f1.pdf [file c4py00327f1.pdf]

## Supporting Information

# Convenient Divergent Synthesis of Linear-Dendron Block Polyphosphoesters via Acyclic Diene Metathesis Polymerization

**Liang Ding,<sup>\*a</sup> Jun Qiu,<sup>a</sup> Jun Wei,<sup>a</sup> Zhenshu Zhu<sup>\*b,c</sup>**

<sup>a</sup> *School of Materials Engineering, Yancheng Institute of Technology, Yancheng, 224051, China*

<sup>b</sup> *Key Laboratory of Drug Quality Control and Pharmacovigilance (China Pharmaceutical University), Ministry of Education, Department of Pharmaceutical Analysis, China Pharmaceutical University, Nanjing 210009, China*

<sup>c</sup> *Department of Chemical and Biomolecular Engineering, National University of Singapore, 117578, Singapore*

Some figures showing  $^1\text{H}$  NMR,  $^{13}\text{C}$  NMR and FT-IR spectra, MALLS-GPC curves, and DLS and TEM images

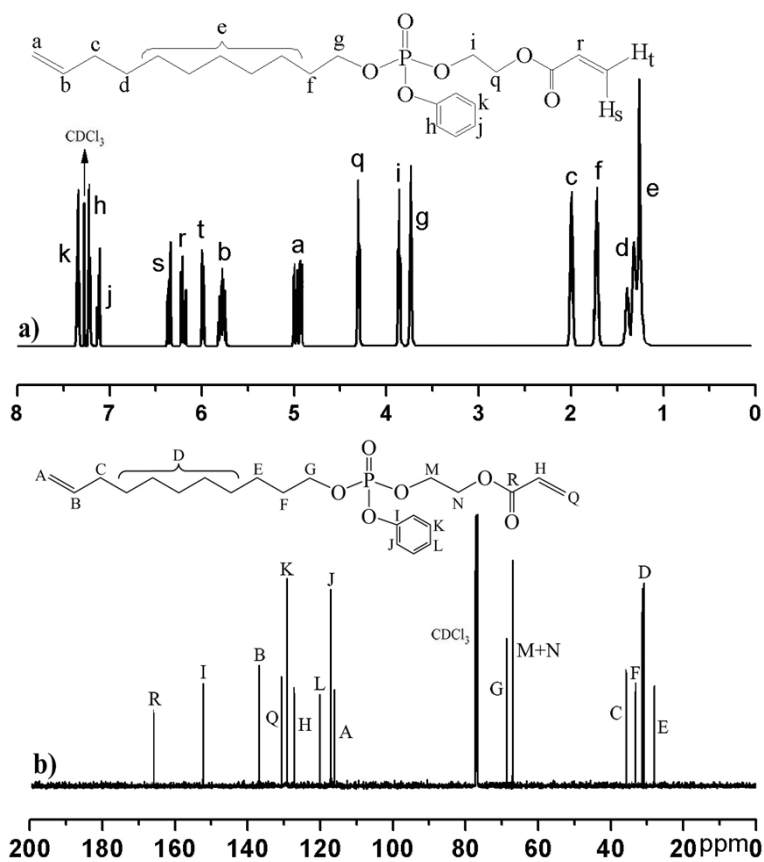

**Fig. S1**  $^1\text{H}$  NMR and  $^{13}\text{C}$  NMR spectra for phosphoester functional asymmetric  $\alpha,\omega$ -diene monomer, **M1**.

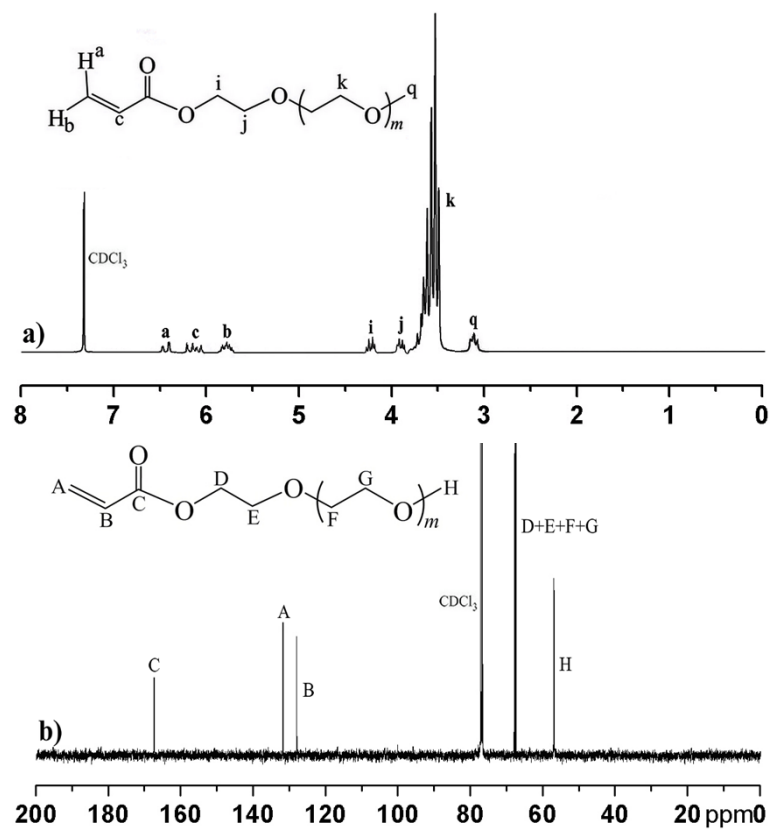

**Fig. S2**  $^1\text{H}$  NMR and  $^{13}\text{C}$  NMR spectra for linear macromolecular chain stopper **PEG-Acrylate**.

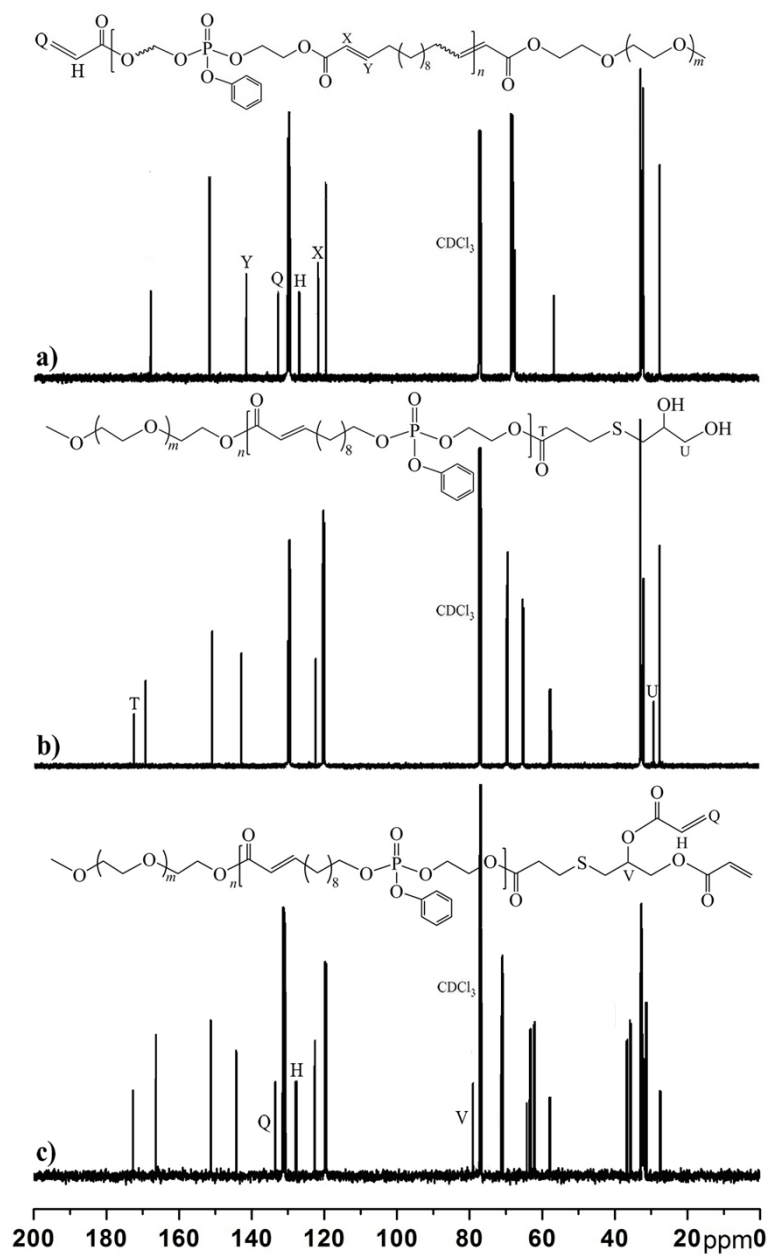

**Fig. S3**  $^{13}\text{C}$  NMR spectra for (a)  $l\text{-D0-Acrylate}$ , (b)  $l\text{-D0-2OH}$ , and (c)  $l\text{-D0-2Acrylate}$  block PPEs.

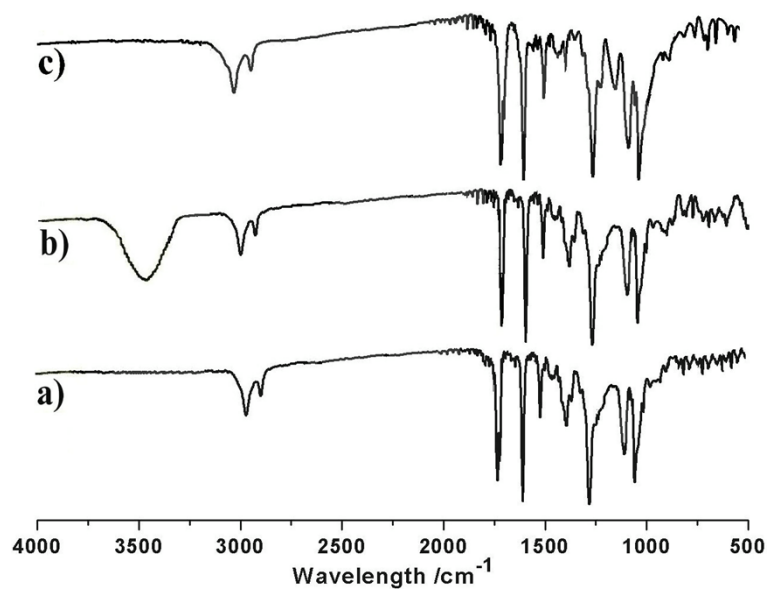

**Fig. S4** FT-IR spectra for (a) *l*-D0-Acrylate, (b) *l*-D0-2OH, and (c) *l*-D0-2Acrylate block PPEs.

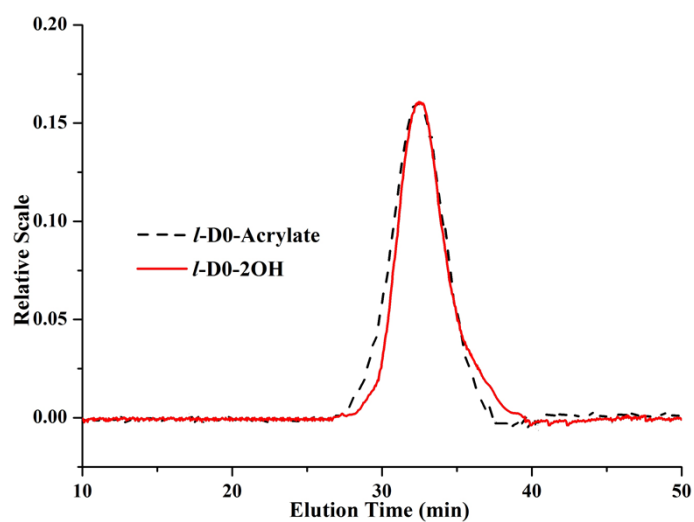

**Fig. S5** Representative multiangle laser light scattering-gel permeation chromatography chromatograms for *l*-D0-2OH and *l*-D0-2Acrylate block PPEs.

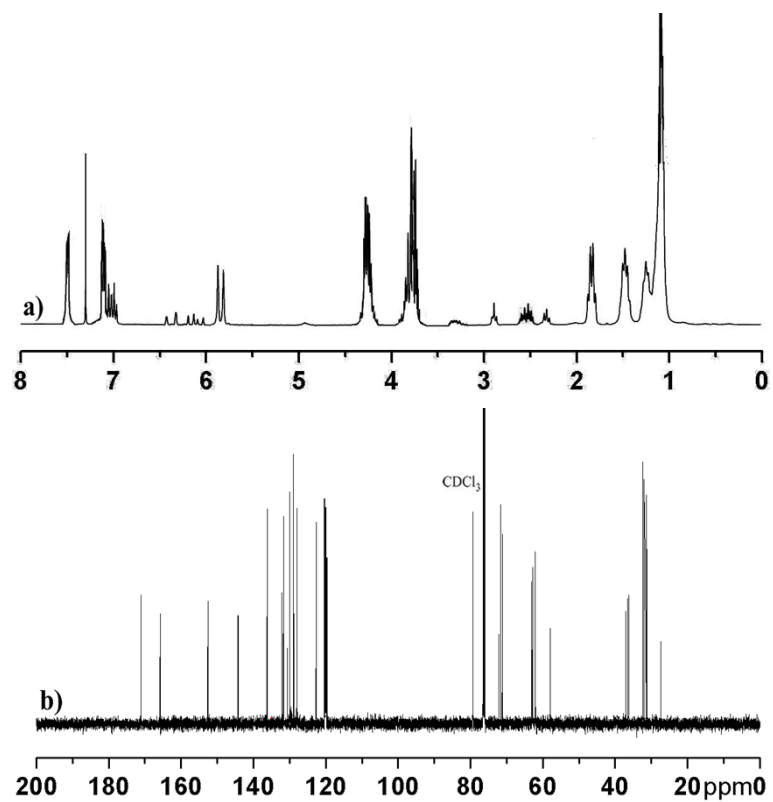

**Fig. S6** <sup>1</sup>H NMR and <sup>13</sup>C NMR spectra for *l*-D3-8Acrylate block PPE.

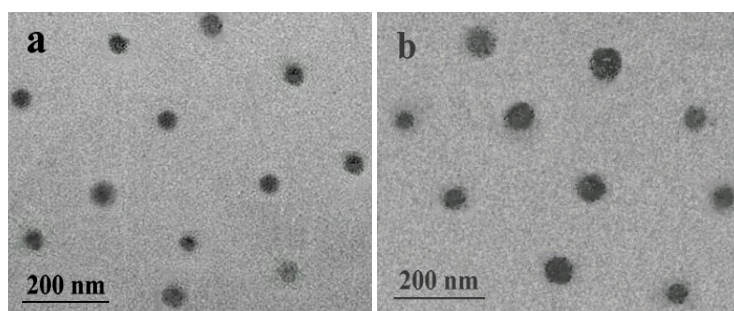

**Fig. S7** TEM photographs of the self-assembled nanoparticles from these *l*-Dm copolymers in THF/water: (a) *l*-D1 and (b) *l*-D2 block PPEs.
